# Supplementary material for: Respirator-inspired shielding and catalytic oxidation strategies for smoke-suppression polymers, enhancing fire safety
Source: Royal Society of Chemistry journal article supplement (doi:10.1039/d4mh01820f), 2025-01-01
Supplement: d4mh01820f1.pdf [file d4mh01820f1.pdf]

## **Respirator-Inspired Shielding and Catalytic Oxidation Strategies for Smoke-Suppression Polymers Enhancing Fire Safety**

Shuai-Qi Guo <sup>a</sup>, Lei He <sup>a</sup>, Dan-Xuan Fang <sup>a</sup>, Ya-Nan Wu <sup>a</sup>, Fu-Rong Zeng <sup>a</sup>, Ming-Jun Chen <sup>b</sup>, Hai-Bo Zhao <sup>a, \*</sup>, Yu-Zhong Wang <sup>a, \*</sup>

<sup>a</sup> *The Collaborative Innovation Center for Eco-Friendly and Fire-Safety Polymeric Materials, State Key Laboratory of Polymer Materials Engineering, National Engineering Laboratory of Eco-Friendly Polymeric Materials (Sichuan), College of Chemistry, Sichuan University, Chengdu 610064, China.*

<sup>b</sup> *School of Science, Xihua University, Chengdu, 610039, China.*

**\*Corresponding Authors:** Tel. & Fax:

E-mail: haibor7@163.com (Hai-Bo Zhao); yzwang@scu.edu.cn (Yu-Zhong Wang)

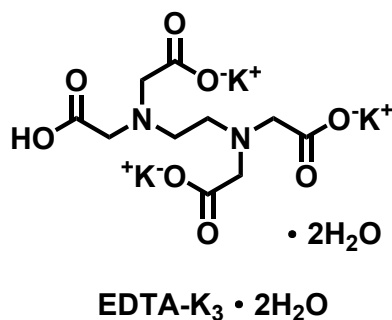

**Fig. S1.** Structure of EDTA-K<sub>3</sub>·2H<sub>2</sub>O

**Table S1.** Detailed AAS data of K element in EDTA-K<sub>3</sub>·2H<sub>2</sub>O

| AAS-K element                          | Test value (%) | Theoretical value (%) |
|----------------------------------------|----------------|-----------------------|
| EDTA-K <sub>3</sub> ·2H <sub>2</sub> O | 27.1           | 26.5                  |

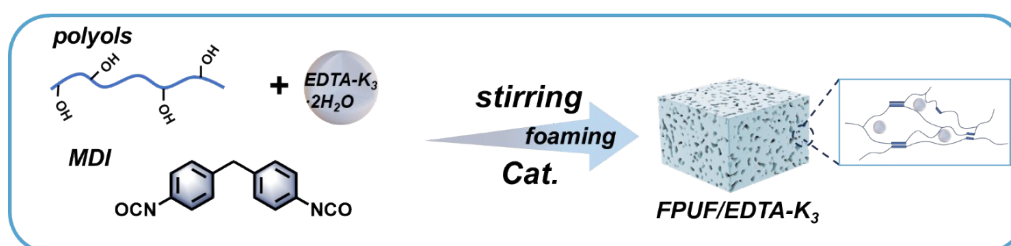

**Fig. S2.** Schematic diagram of the fabrication process for EDTA-K<sub>3</sub> filled FPUF

**Table S2.** Formulations of FPUF samples

| Sample                      | DEP-330G (php) | POP-H3O (php) | H <sub>2</sub> O (php) | TEOA (php) | DC-2525 (php) | A-1 (php) | A33 (php) | FRs (php) | MDI-2424 (php) | Density (kg/m <sup>3</sup> ) |
|-----------------------------|----------------|---------------|------------------------|------------|---------------|-----------|-----------|-----------|----------------|------------------------------|
| Neat FPUF                   | 80.0           | 20.0          | 0.85                   | 1.0        | 5.0           | 0.1       | 0.9       | 0         | 28.0           | 132±2                        |
| FPUF/15 EDTA-K <sub>3</sub> | 80.0           | 20.0          | 1.00                   | 1.0        | 5.0           | 0.1       | 0.9       | 15        | 31.0           | 131±3                        |
| FPUF/20 EDTA-K <sub>3</sub> | 80.0           | 20.0          | 1.10                   | 1.0        | 5.0           | 0.1       | 0.9       | 20        | 33.0           | 128±2                        |
| FPUF/25 EDTA-K <sub>3</sub> | 80.0           | 20.0          | 1.16                   | 1.0        | 5.0           | 0.1       | 0.9       | 25        | 34.5           | 135±3                        |

FR: flame retardant (EDTA-K<sub>3</sub>); php: parts per hundred polyether polyols by weight.

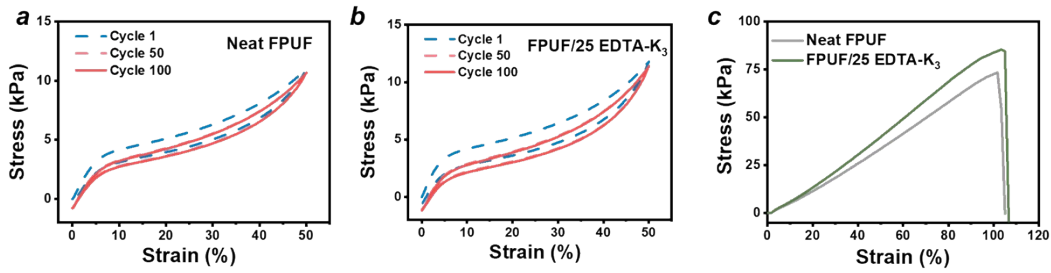

**Fig. S3.** Mechanical performance of flame retardant FPUF. (a-b) Compressive cyclic stress–strain curves and (c) the tensile stress–strain curves

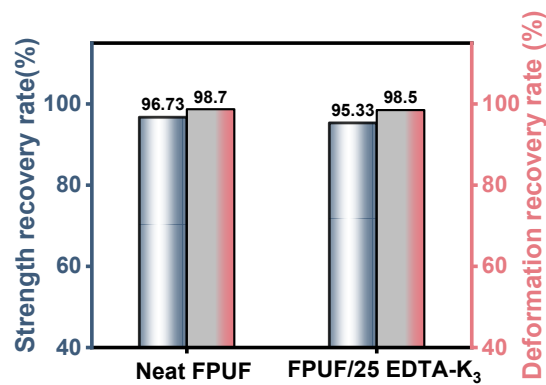

**Fig. S4.** Compression resilience performance of Neat FPUF and FPUF/25 EDTA-K<sub>3</sub>.

**Table S3.** Results of the compression and tension tests for FPUF and FPUF/EDTA-K<sub>3</sub>

| Sample                      | Density (kg/m <sup>3</sup> ) | $\theta$ (%) | $\varepsilon$ (%) | $\sigma$ (kPa) | Toughness (kJ/m <sup>3</sup> ) |
|-----------------------------|------------------------------|--------------|-------------------|----------------|--------------------------------|
| Neat FPUF                   | 132±2                        | 98.7±0.2     | 98±4              | 72±3           | 35±3                           |
| FPUF/25 EDTA-K <sub>3</sub> | 135±3                        | 98.5±0.2     | 98±7              | 76±5           | 39±6                           |

$\theta$ ,  $\varepsilon$ , and  $\sigma$  represent the deformation recovery ratio, elongation at break, and tensile strength, respectively.

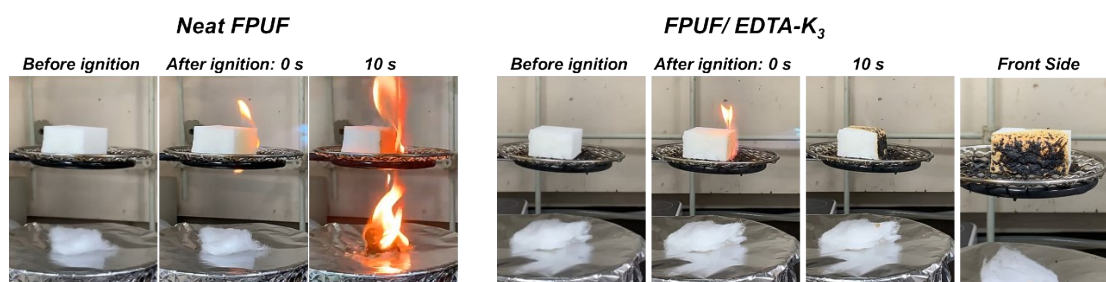

**Fig. S5.** Digital pictures of FPUF/EDTA-K<sub>3</sub> before and after the butane spray gun ignition experiment.

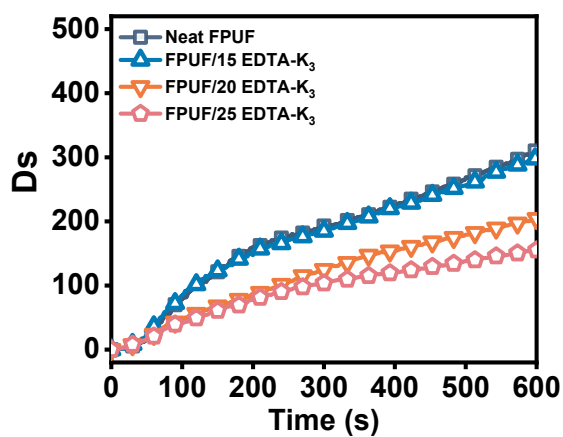

**Fig. S6.** Specific smoke density ( $D_s$ ) for Neat FPUF and FPUF/ EDTA-K<sub>3</sub> with non-pilot flame mode.

**Table S4.** Detailed smoke test data for Neat FPUF and FPUF/EDTA-K<sub>3</sub>.

| Sample                      | $D_{s_{max}}$ | $D_{s_{max}}^b$ | LOI (vol%)     |
|-----------------------------|---------------|-----------------|----------------|
| Neat FPUF                   | $380 \pm 12$  | $310 \pm 20$    | $19.5 \pm 0.1$ |
| FPUF/15 EDTA-K <sub>3</sub> | $423 \pm 21$  | $297 \pm 18$    | $24.4 \pm 0.2$ |
| FPUF/20 EDTA-K <sub>3</sub> | $419 \pm 24$  | $204 \pm 14$    | $25.8 \pm 0.2$ |
| FPUF/25 EDTA-K <sub>3</sub> | $172 \pm 15$  | $155 \pm 15$    | $26.1 \pm 0.2$ |

a: pilot flame mode; b: non-pilot flame mode

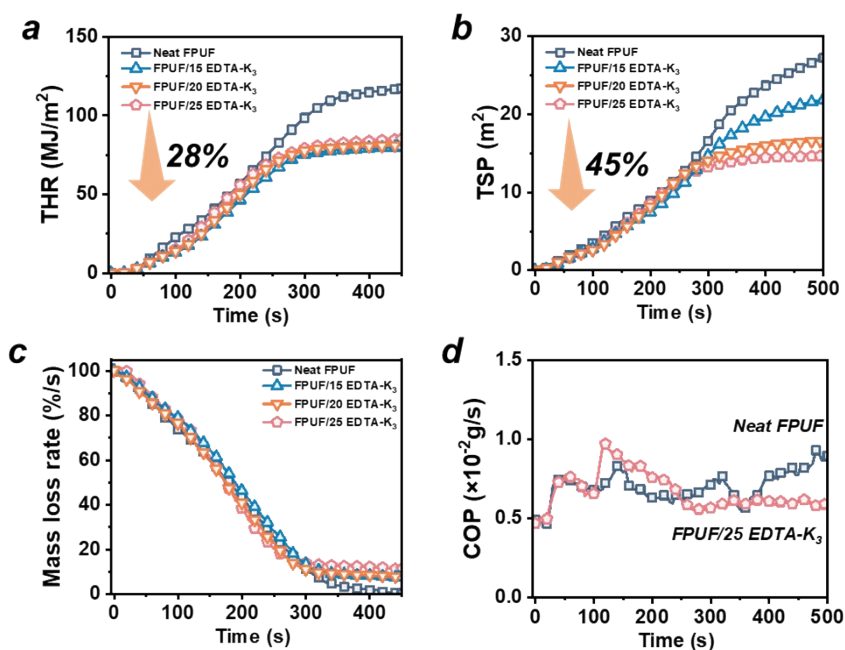

**Fig. S7.** Results of the cone calorimetry test for Neat FPUF and FPUF/EDTA-K<sub>3</sub> with varying content at the heat flux of 25 kW/m<sup>2</sup>. (a) THR, (b) TSP, (c) Mass loss rate (MLR) curves and (d) COP.

**Table S5.** Detailed combustion data of Neat FPUF and FPUF/EDTA-K<sub>3</sub> obtained from cone calorimetry at the heat flux of 25 kW/m<sup>2</sup>.

| Sample                      | TTI (s) | pHRR (kW/m <sup>2</sup> ) | THR (MJ/m <sup>2</sup> ) | TSP (m <sup>2</sup> ) | char yield (%) | Av-EHC (MJ/kg) |
|-----------------------------|---------|---------------------------|--------------------------|-----------------------|----------------|----------------|
| Neat FPUF                   | 12 ± 1  | 450 ± 12                  | 118 ± 3                  | 26.1 ± 1.1            | 3.2 ± 0.3      | 29.3 ± 1.1     |
| FPUF/15 EDTA-K <sub>3</sub> | 10 ± 1  | 400 ± 22                  | 80 ± 2                   | 22.0 ± 1.4            | 8.1 ± 0.2      | 24.8 ± 1.2     |
| FPUF/20 EDTA-K <sub>3</sub> | 10 ± 1  | 433 ± 19                  | 81 ± 3                   | 16.5 ± 0.4            | 10.6 ± 0.3     | 25.3 ± 0.9     |
| FPUF/25 EDTA-K <sub>3</sub> | 10 ± 1  | 470 ± 23                  | 85 ± 2                   | 14.6 ± 1.2            | 11.5 ± 0.1     | 27.4 ± 1.5     |

<sup>a</sup>TTI: time to ignition; pHRR: peak heat release rate; THR: total heat release; TSR: total smoke release; TSP: total smoke production; Av-EHC means the average effective heat of combustion of volatiles.

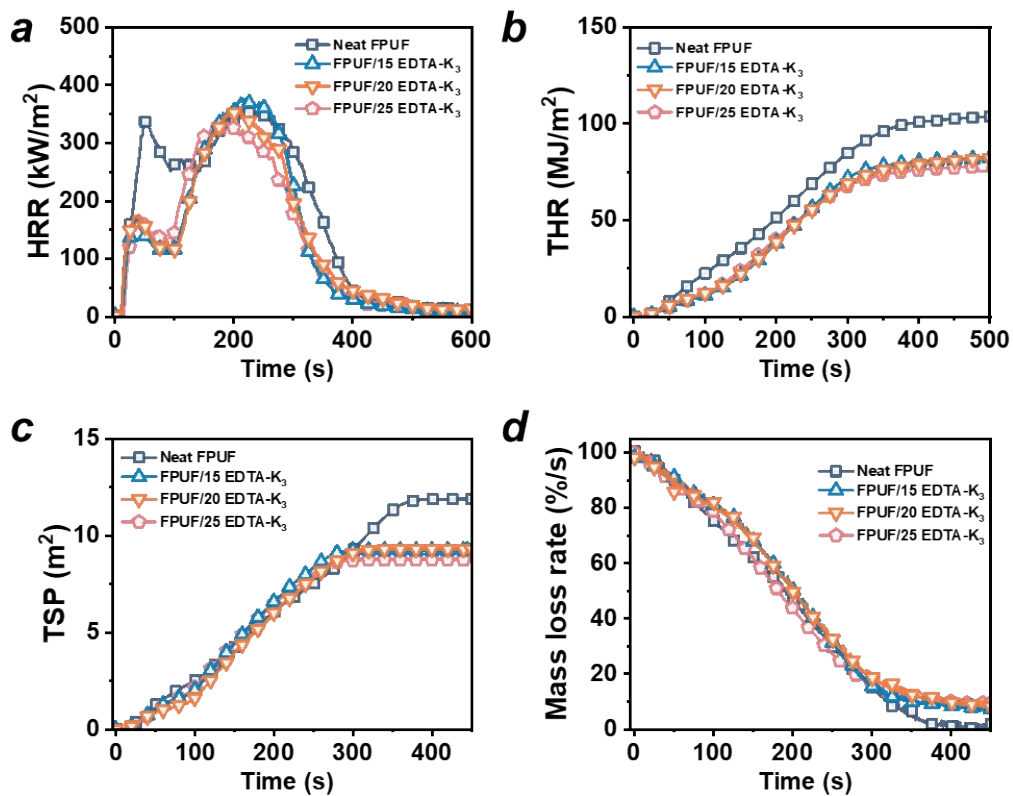

**Fig. S8.** Results of the cone calorimetry tests for Neat FPUF and FPUF/EDTA-K<sub>3</sub> with varying content at the heat flux of 35 kW/m<sup>2</sup>. (a) HRR, (b) THR and (c) TSP curves.

**Table S6.** Detailed combustion data of Neat FPUF and FPUF/EDTA-K<sub>3</sub> obtained from cone calorimetry at the heat flux of 35 kW/m<sup>2</sup>.

| Sample                      | TTI (s) | pHRR (kW/m <sup>2</sup> ) | THR (MJ/m <sup>2</sup> ) | TSP (m <sup>2</sup> ) | char yield (%) | Av-EHC (MJ/kg) |
|-----------------------------|---------|---------------------------|--------------------------|-----------------------|----------------|----------------|
| Neat FPUF                   | 11 ± 1  | 358 ± 12                  | 104 ± 2                  | 11.8 ± 1.1            | 4.5 ± 0.2      | 21.6 ± 1.1     |
| FPUF/15 EDTA-K <sub>3</sub> | 13 ± 2  | 377 ± 18                  | 83 ± 2                   | 9.2 ± 1.8             | 12.2 ± 0.3     | 16.2 ± 0.9     |
| FPUF/20 EDTA-K <sub>3</sub> | 12 ± 1  | 361 ± 10                  | 83 ± 3                   | 9.3 ± 1.3             | 13.7 ± 0.5     | 17.9 ± 1.2     |
| FPUF/25 EDTA-K <sub>3</sub> | 12 ± 1  | 338 ± 13                  | 78 ± 2                   | 8.7 ± 0.5             | 14.5 ± 0.3     | 14.0 ± 1.5     |

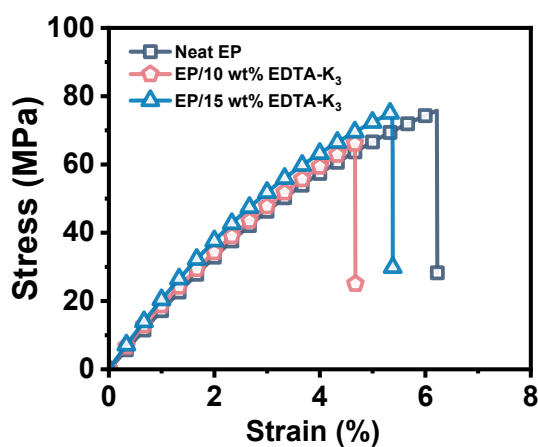

**Fig. S9.** Stress-strain curves.

**Table S7.** Mechanical properties of the EP thermosets.

| Sample                        | Tensile strength (MPa) | Tensile Strain (%) | Tensile modulus (MPa) | Impact strength (kJ·m <sup>-2</sup> ) |
|-------------------------------|------------------------|--------------------|-----------------------|---------------------------------------|
| Neat EP                       | 75.7 ± 1.9             | 5.9 ± 0.3          | 1477 ± 31             | 10.0 ± 2.4                            |
| EP/10 wt% EDTA-K <sub>3</sub> | 67.6 ± 2.1             | 4.5 ± 0.2          | 1565 ± 129            | 10.7 ± 1.7                            |

|                                  |            |           |            |           |
|----------------------------------|------------|-----------|------------|-----------|
| EP/15 wt%<br>EDTA-K <sub>3</sub> | 74.0 ± 1.8 | 5.4 ± 0.1 | 1539 ± 104 | 8.2 ± 0.5 |
|----------------------------------|------------|-----------|------------|-----------|

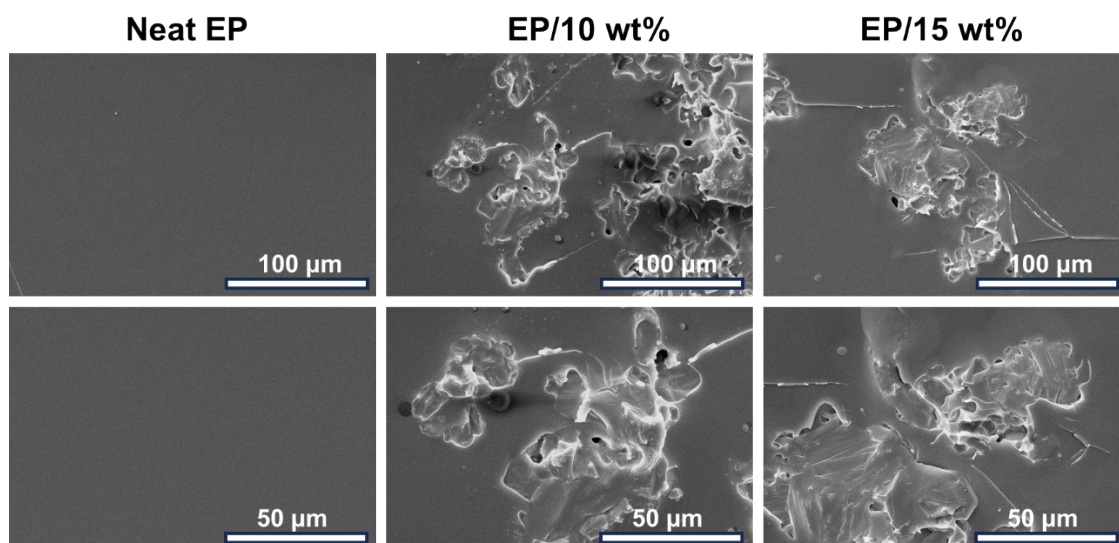

**Fig. S10.** SEM images of the impact fracture surface for the EP thermosets.

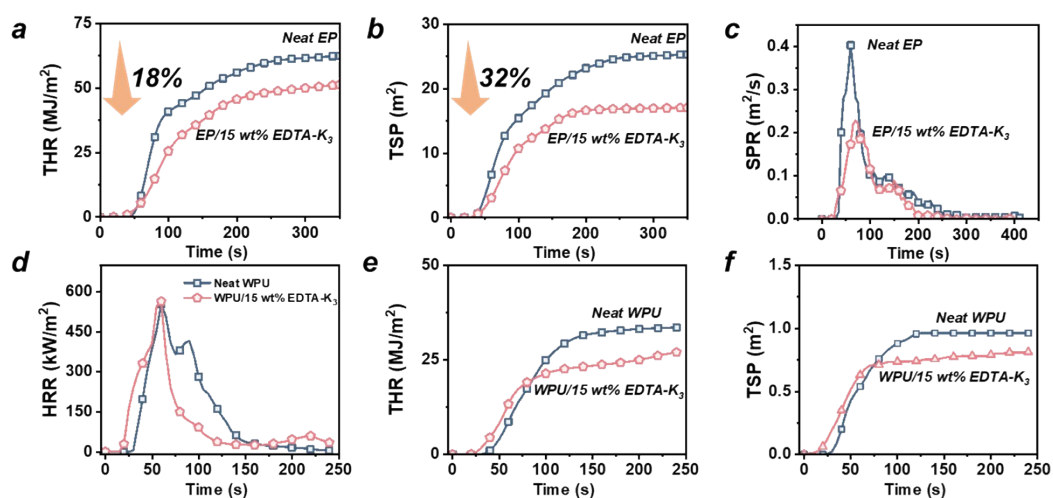

**Fig. S11.** Flame retardancy and smoke suppression. (a) THR, (b) TSP, and (c) SPR for EPs. (d) HRR, (e) THR, and (f) TSP for WPUs.



**Table S8.** Detailed data from cone calorimetry and smoke density of EPs.

| Sample                        | TTI (s) | pHRR (kW/m <sup>2</sup> ) | THR (MJ/m <sup>2</sup> ) | TSP (m <sup>2</sup> ) | Char yield (%) | Ds               |
|-------------------------------|---------|---------------------------|--------------------------|-----------------------|----------------|------------------|
| Neat EP                       | 30 ± 1  | 1466 ± 22                 | 63 ± 1                   | 25.5 ± 1.3            | 6.2 ± 0.8      | 1320 (overrange) |
| EP/10 wt% EDTA-K <sub>3</sub> | 15 ± 1  | 960 ± 21                  | 62 ± 2                   | 19.0 ± 1.0            | 11.2 ± 1.0     | 941 ± 12         |
| EP/15 wt% EDTA-K <sub>3</sub> | 20 ± 1  | 616 ± 18                  | 52 ± 1                   | 17.0 ± 0.2            | 13.7 ± 1.1     | 1002 ± 21        |

**Table S9.** Detailed data from cone calorimetry of WPU.

| Sample                         | TTI (s) | pHRR (kW/m <sup>2</sup> ) | THR (MJ/m <sup>2</sup> ) | TSP (m <sup>2</sup> ) | Char yield (%) |
|--------------------------------|---------|---------------------------|--------------------------|-----------------------|----------------|
| Neat WPU                       | 25 ± 1  | 554±21                    | 33 ±1                    | 0.95±0.05             | 0              |
| WPU/15 wt% EDTA-K <sub>3</sub> | 13 ± 2  | 564±19                    | 27±2                     | 0.79±0.02             | 1.2±0.2        |

**Table S10.** Comparisons of EDTA-K<sub>3</sub> with other flame retardant FPUFs

| FR Structure | FR content (wt%) | LOI (vol%) | ΔTSP (%) | Cone calorimeter test condition                                                                            | Ref. |
|--------------|------------------|------------|----------|------------------------------------------------------------------------------------------------------------|------|
| EDPPA        | 10               | 21.4       | +52.6    | Sample size: 100×100×25 mm <sup>3</sup><br>Heat flux: 25 kW/m <sup>2</sup><br>according to ISO 5660-1:2015 | [38] |
|              | 20               | 23.6       | +74.4    |                                                                                                            |      |
| EDPPO        | 20               | 22.1       | +64.6    |                                                                                                            |      |
| EDPMA        | 20               | 22.5       | +71.4    |                                                                                                            |      |
| D-Urea       | 10               | 23.0       | +203.7   |                                                                                                            | [11] |
|              | 20               | 23.5       | +245.5   |                                                                                                            |      |
| DMPMA        | 6.4              | 21.6       | +17.6    |                                                                                                            | [39] |
|              | 12.8             | 22.3       | +24.7    |                                                                                                            |      |
| TAMPO        | 6.4              | 19.0       | +19.4    |                                                                                                            |      |

|                     |          |      |       |           |
|---------------------|----------|------|-------|-----------|
|                     | 12.8     | 19.4 | +12.9 |           |
| BDMPP               | 6.4      | 21.5 | +106  |           |
| DMMP                | 6.4      | 21.0 | +58   | [37]      |
|                     | 12.8     | 21.5 | +63   |           |
| EDTA-K <sub>3</sub> | 15 wt.%  | 26.1 | -45%  | This work |
|                     | (25 php) |      |       |           |

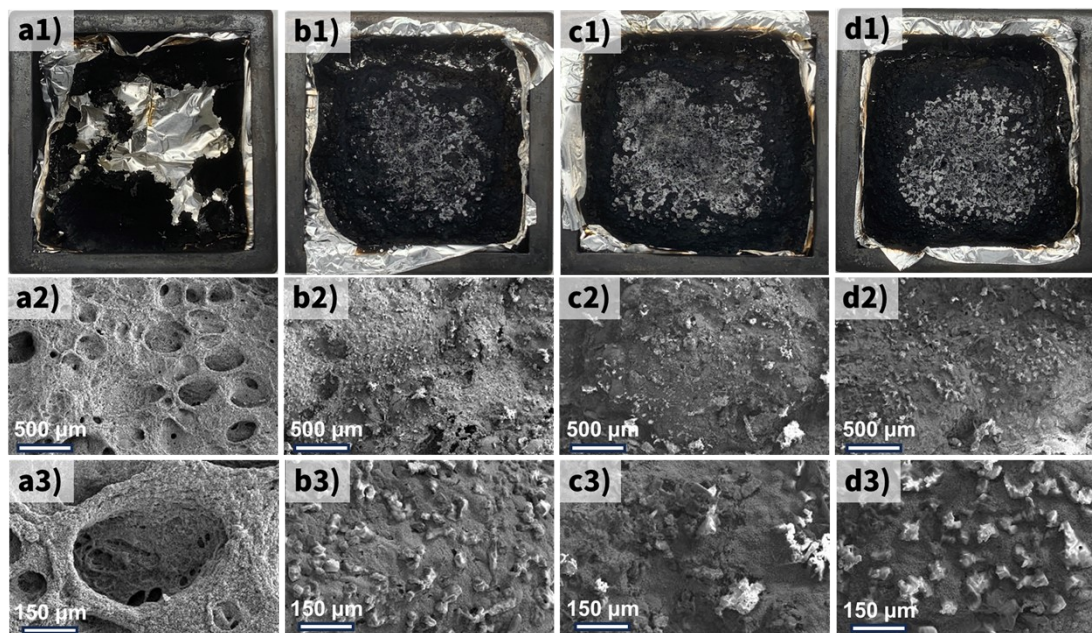

**Fig. S12.** Digital and SEM images of the char residues after cone calorimetry at the heat flux of 25 kW/m<sup>2</sup> for (a) Neat FPUF, (b) FPUF/15 EDTA-K<sub>3</sub>, (c) FPUF/20 EDTA-K<sub>3</sub>, and (d) FPUF/25 EDTA-K<sub>3</sub>.

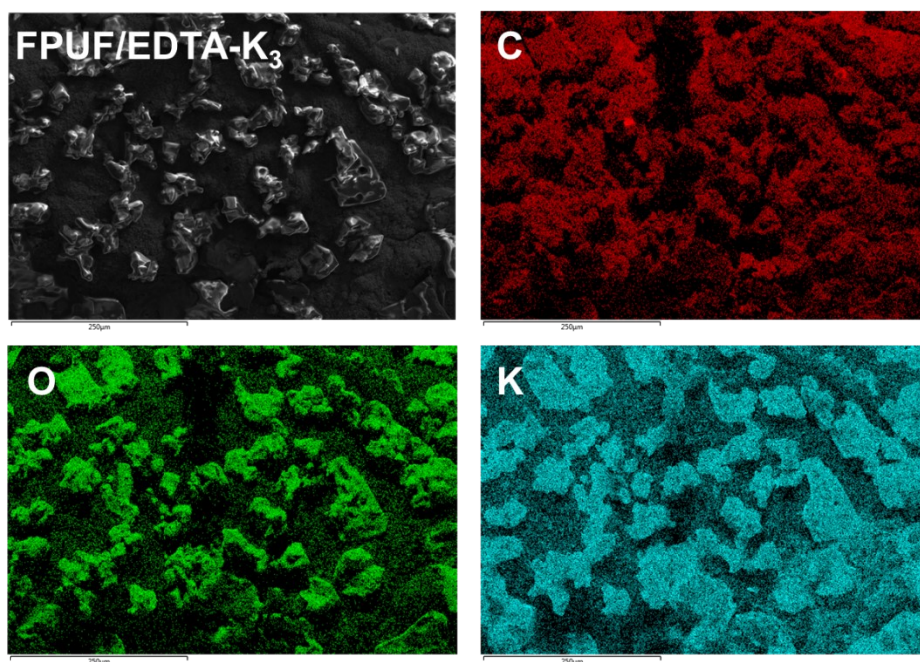

**Fig. S13.** SEM images for the char of the FPUF/25 EDTA-K<sub>3</sub> along with EDS elemental mapping.

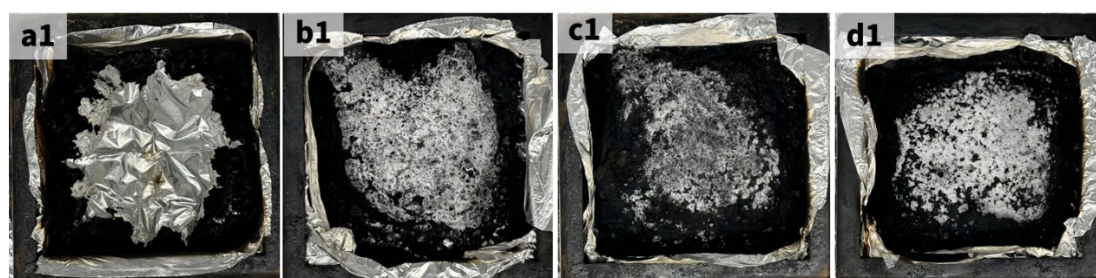

**Fig. S14.** Digital of the char residues after cone calorimetry at the heat flux of 35 kW/m<sup>2</sup> for (a) Neat FPUF, (b) FPUF/15 EDTA-K<sub>3</sub>, (c) FPUF/20 EDTA-K<sub>3</sub>, (d) FPUF/25 EDTA-K<sub>3</sub>.

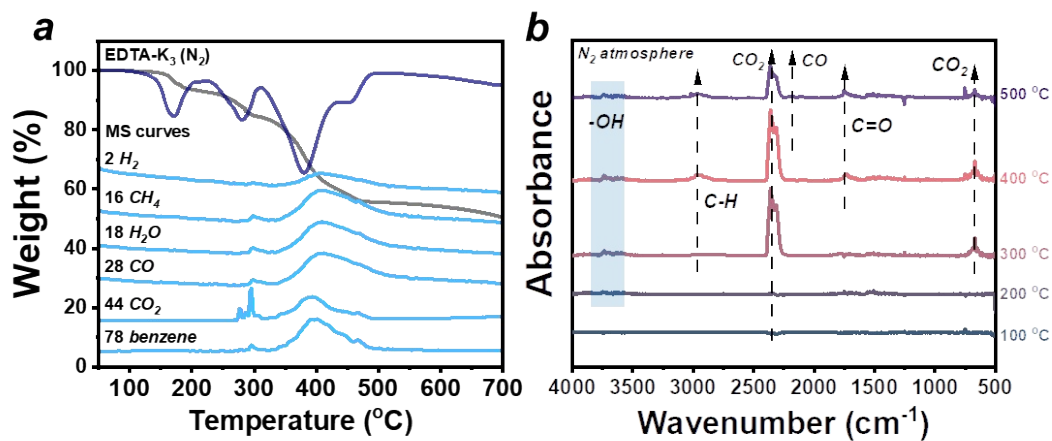

Fig. S15. TG-MS and TG-FTIR curves of EDTA-K<sub>3</sub> under nitrogen.

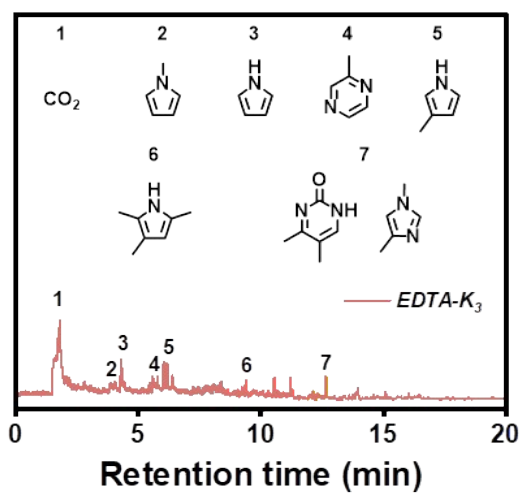

Fig. S16. Total ion chromatogram of EDTA-K<sub>3</sub> at 600 °C from Py-GC/MS and the main pyrolysis products.

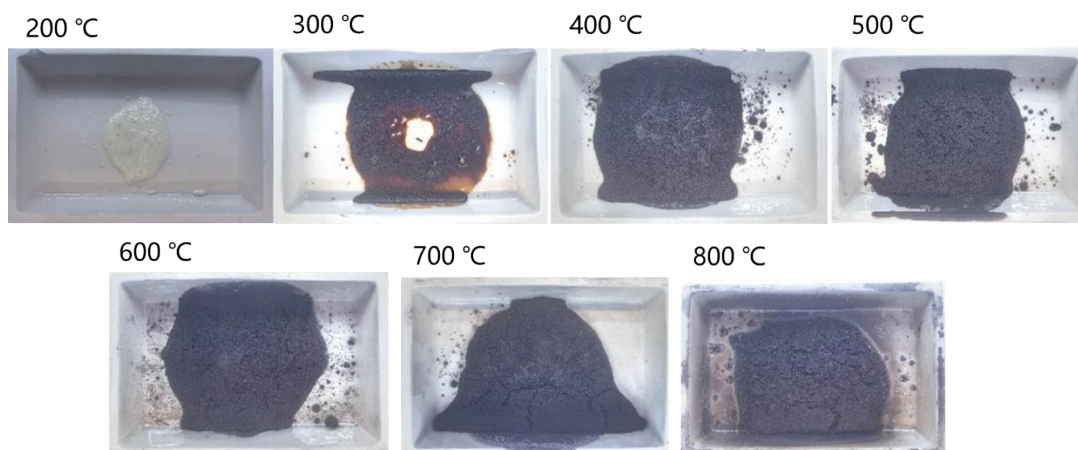

**Fig. S17.** Digital photos of carbon residue in tube furnace of EDTA-K<sub>3</sub> at different temperature.

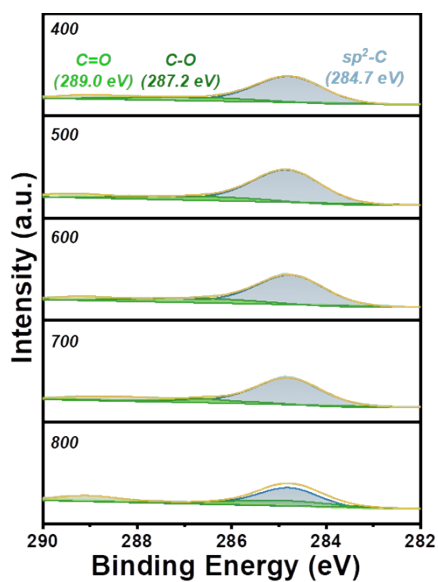

**Fig. S18.** High-resolution C 1s X-ray photoelectron spectra of carbons obtained from EDTA-K<sub>3</sub> at different temperatures.

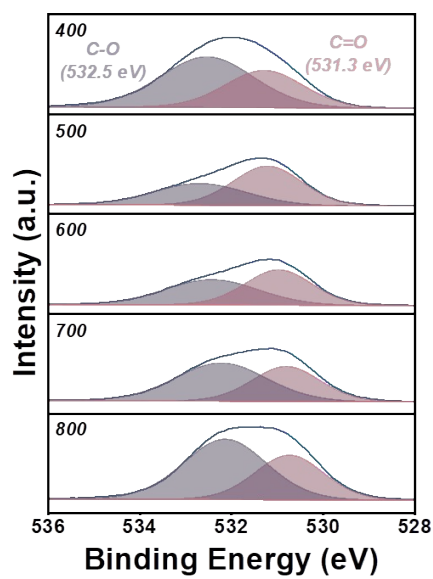

**Fig. S19.** High-resolution O 1s X-ray photoelectron spectra of carbons obtained from EDTA-K<sub>3</sub> at different temperatures.

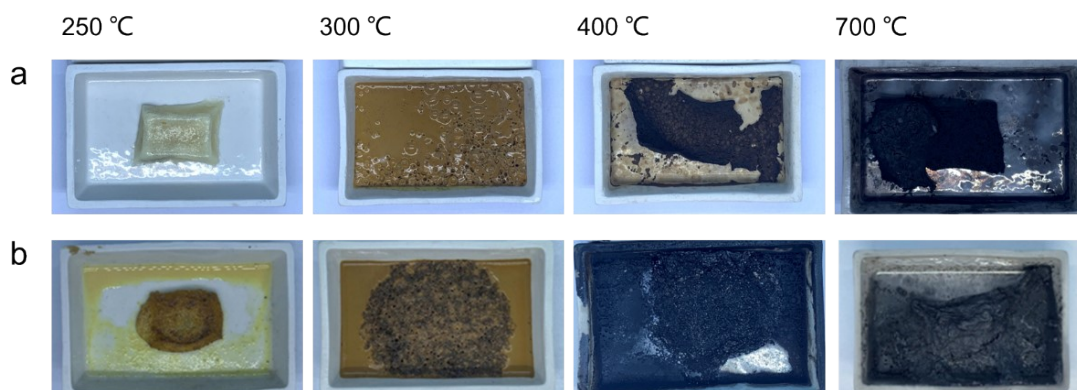

**Fig. S20.** Digital photos of carbon residue in the tube furnace of (a) Neat FPUF and (b) FPUF/25 EDTA-K<sub>3</sub> at different temperatures under nitrogen atmosphere.

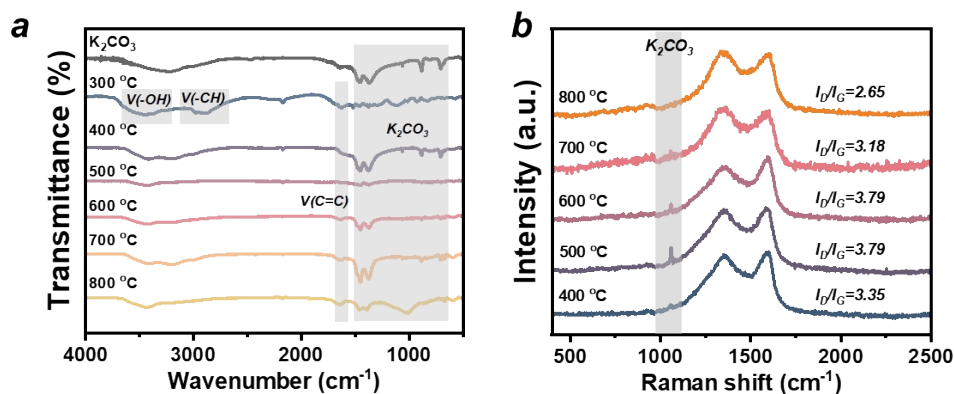

**Fig. S21.** Structural characterizations of the carbon residue of FPUF/EDTA-K<sub>3</sub> in the tube furnace under N<sub>2</sub>. (a) Fourier transform-infrared spectra and (b) Raman spectra.

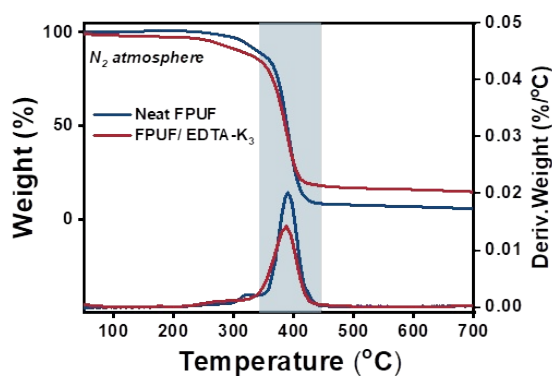

**Fig. S22.** TG curves of Neat FPUF and FPUF/EDTA-K<sub>3</sub> under nitrogen atmosphere.

**Table S11.** Detailed TG data of Neat FPUF and FPUF/EDTA-K<sub>3</sub> under nitrogen atmosphere.

| Sample/N <sub>2</sub>       | T <sub>5%</sub><br>(°C) | T <sub>max</sub><br>(°C) | R <sub>max</sub><br>(%/°C) | Residue<br>(%) |
|-----------------------------|-------------------------|--------------------------|----------------------------|----------------|
| Neat FPUF                   | 315.4                   | 390.3                    | 2.00                       | 5.4            |
| FPUF/25 EDTA-K <sub>3</sub> | 265.0                   | 387.6                    | 1.42                       | 11.5           |

**Table S12.** Detailed TG data of Neat FPUF and FPUF/EDTA-K<sub>3</sub> under air atmosphere.

| Sample/air                  | T <sub>5%</sub><br>(°C) | T <sub>max1</sub> /R <sub>max1</sub><br>(°C)/(%/°C) | T <sub>max2</sub> /R <sub>max2</sub><br>(°C)/(%/°C) | T <sub>max3</sub> /R <sub>max3</sub><br>(°C)/(%/°C) | Residue<br>(%) |
|-----------------------------|-------------------------|-----------------------------------------------------|-----------------------------------------------------|-----------------------------------------------------|----------------|
| Neat FPUF                   | 275.5                   | 330.6/1.04                                          | 357.6/1.02                                          | 531.3/0.15                                          | 0.7            |
| FPUF/25 EDTA-K <sub>3</sub> | 249.7                   | 326.3/1.13                                          | 487.3/0.08                                          | -                                                   | 10.1           |

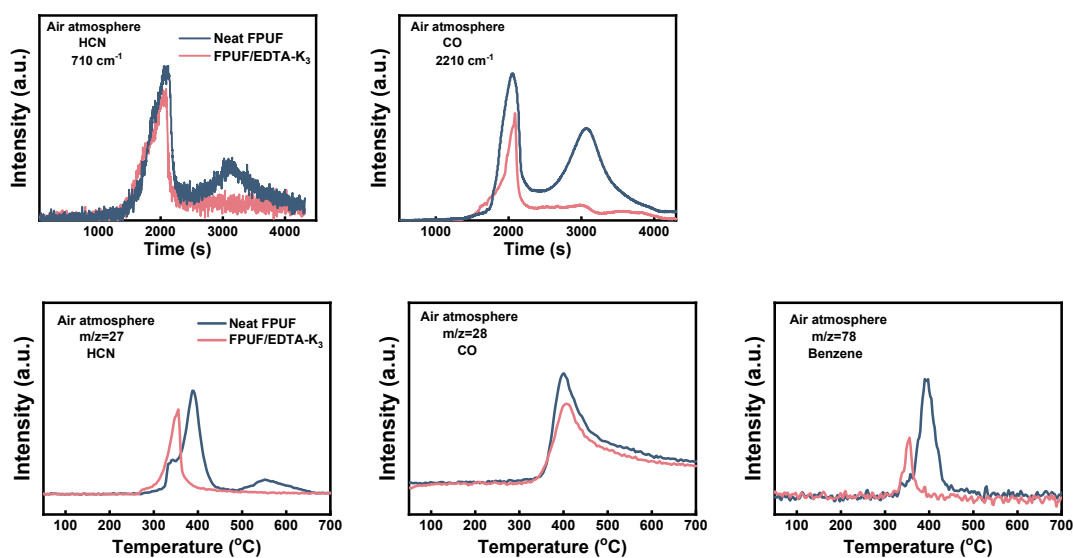

**Fig. S23.** TG-MS spectra of gaseous pyrolysis products of Neat FPUF and FPUF/EDTA-K<sub>3</sub> under air atmosphere.

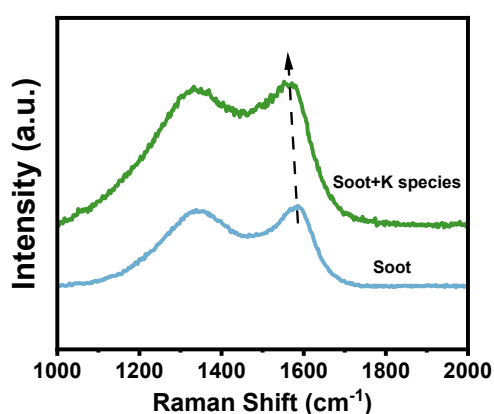

**Fig. S24.** Raman spectra of soot made by Neat FPUF and FPUF/EDTA-K<sub>3</sub>.



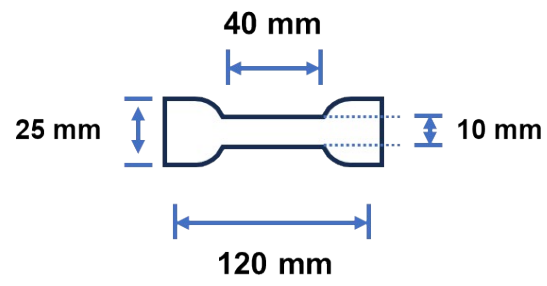

**Fig. S25.** Simple graphic diagram of test piece cutter for tensile measurements.
